# Supplementary material for: Variational first hyperpolarizabilities of 2,3-naphtho-15-crown-5 ether derivatives with cation-complexing: a potential and selective cation detector
Source: Royal Society of Chemistry journal article supplement (doi:10.1039/c6cp04577d), 2016-01-01
Supplement: c6cp04577d1.pdf [file c6cp04577d1.pdf]

**Electronic supplementary information for**

**Variational first hyperpolarizabilities of 2,3-naphtho-15-crown-5  
ether derivatives with cation-complexing: a potential and selective  
cation detector**

Hai-Ling Yu<sup>\*,a</sup>, Wen-Yong Wang<sup>b</sup>, Bo Hong<sup>\*,a</sup>, Ying Zong<sup>a</sup> and Yan-Ling Si<sup>a</sup>,  
Zhong-Qiang Hu<sup>a</sup>

*<sup>a</sup> College of Resources and Environmental Science, Jilin Agricultural University, Changchun  
130118, People's Republic of China*

*<sup>b</sup> JiangSu XinHai Senior High School, Lianyungang City 222000, Jangsu, People's Republic of  
China*

---

\* Corresponding Author: Hai-Ling Yu, E-mail addresses: [jlauyu@163.com](mailto:jlauyu@163.com)  
Bo Hong, E-mail addresses: [jlauhb@163.com](mailto:jlauhb@163.com)

**Table S1.** Calculated bond length of M-O and O-O bonds at the B3LYP/6-31G(d,p)/LanL2DZ level.

| complex                | M-O <sub>1</sub> | M-O <sub>2</sub> | M-O <sub>3</sub> | M-O <sub>4</sub> | M-O <sub>5</sub> | O <sub>1</sub> -O <sub>2</sub> | O <sub>2</sub> -O <sub>3</sub> | O <sub>3</sub> -O <sub>4</sub> | O <sub>4</sub> -O <sub>5</sub> | O <sub>5</sub> -O <sub>1</sub> |
|------------------------|------------------|------------------|------------------|------------------|------------------|--------------------------------|--------------------------------|--------------------------------|--------------------------------|--------------------------------|
| N15C5                  | -                | -                | -                | -                | -                | 2.823                          | 2.889                          | 2.889                          | 2.823                          | 2.569                          |
| N15C5*Li <sup>+</sup>  | 2.208            | 2.202            | 2.192            | 2.202            | 2.208            | 2.602                          | 2.616                          | 2.616                          | 2.602                          | 2.533                          |
| N15C5*Na <sup>+</sup>  | 2.297            | 2.311            | 2.308            | 2.311            | 2.297            | 2.741                          | 2.764                          | 2.764                          | 2.741                          | 2.614                          |
| N15C5*K <sup>+</sup>   | 2.651            | 2.684            | 2.699            | 2.684            | 2.651            | 2.766                          | 2.785                          | 2.785                          | 2.766                          | 2.682                          |
| N15C5*Be <sup>2+</sup> | 1.846            | 1.714            | 1.707            | 1.882            | 1.705            | 2.470                          | 2.568                          | 2.483                          | 2.434                          | 2.433                          |
| N15C5*Mg <sup>2+</sup> | 2.134            | 2.135            | 2.138            | 2.135            | 2.134            | 2.515                          | 2.507                          | 2.507                          | 2.515                          | 2.513                          |
| N15C5*Ca <sup>2+</sup> | 2.315            | 2.315            | 2.350            | 2.315            | 2.315            | 2.679                          | 2.681                          | 2.681                          | 2.679                          | 2.668                          |
| N15C5*Co <sup>2+</sup> | 2.483            | 2.069            | 2.055            | 2.069            | 2.483            | 2.633                          | 2.639                          | 2.639                          | 2.633                          | 2.521                          |
| N15C5*Ni <sup>2+</sup> | 2.542            | 1.991            | 1.954            | 1.991            | 2.542            | 2.607                          | 2.585                          | 2.585                          | 2.607                          | 2.487                          |
| N15C5*Cu <sup>2+</sup> | 2.441            | 2.133            | 2.159            | 2.133            | 2.441            | 2.681                          | 2.693                          | 2.693                          | 2.681                          | 2.541                          |

**Table S2.** Dipole moments (Debye), individual components of first hyperpolarizabilities (a.u.), total first hyperpolarizabilities (a.u.), and projection of  $\beta$  on dipole moment (a.u.) computed at the BHandLYP /6-311+G(d,p)/LanL2DZ level.

| complex                | $\mu_y$ | $\beta_x$ | $\beta_y$ | $\beta_z$ | $\beta_{tot}$ | $\beta_{vec}$ |
|------------------------|---------|-----------|-----------|-----------|---------------|---------------|
| N15C5                  | -2.56   | 177.3     | -813.1    | 0.0       | 832.2         | 826.4         |
| N15C5*Li <sup>+</sup>  | -8.1    | 42.4      | -301.5    | 0.0       | 304.4         | 301.8         |
| N15C5*Na <sup>+</sup>  | -7.6    | 62.9      | -299.7    | 0.0       | 306.2         | 298.2         |
| N15C5*K <sup>+</sup>   | -7.7    | 12.0      | -267.5    | 0.0       | 267.8         | 264.7         |
| N15C5*Be <sup>2+</sup> | -11.1   | 18.4      | 205.3     | 16.1      | 206.7         | -205.1        |
| N15C5*Mg <sup>2+</sup> | -12.5   | -16.0     | 163.6     | 0.0       | 164.4         | -163.9        |
| N15C5*Ca <sup>2+</sup> | -12.0   | -55.7     | 282.1     | 0.0       | 287.6         | -285.3        |
| N15C5*Co <sup>2+</sup> | -15.3   | 999.3     | 207877.6  | -0.5      | 207880.0      | -207725.4     |
| N15C5*Ni <sup>2+</sup> | -15.4   | 397.3     | 42057.3   | 0.0       | 42059.2       | -41985.2      |
| N15C5*Cu <sup>2+</sup> | -6.8    | 3798.0    | 33944.9   | 0.0       | 34156.7       | -34141.9      |

**Table S3.** Energies, oscillator strengths and major contributions for N15C5, N15C5\*Li<sup>+</sup>, N15C5\*Be<sup>2+</sup> and N15C5\*Co<sup>2+</sup> at the CAM-B3LYP/6-311+G(d,p)/LanL2DZ level.

| complex                | $\Delta E$ | $f_{os}$ | MO transition                         |
|------------------------|------------|----------|---------------------------------------|
| N15C5                  | 5.70       | 1.4087   | HOMO→L+4 (56%), HOMO-1→LUMO (28%)     |
| N15C5*Li <sup>+</sup>  | 5.78       | 1.1175   | HOMO→L+5 (45%), HOMO-1→LUMO (33%)     |
| N15C5*Be <sup>2+</sup> | 5.67       | 0.9488   | HOMO-1→LUMO (42%), HOMO→L+3 (29%)     |
| N15C5*Ni <sup>2+</sup> | 0.98       | 0.0880   | HOMO-1→LUMO (83%), HOMO-11→LUMO (15%) |

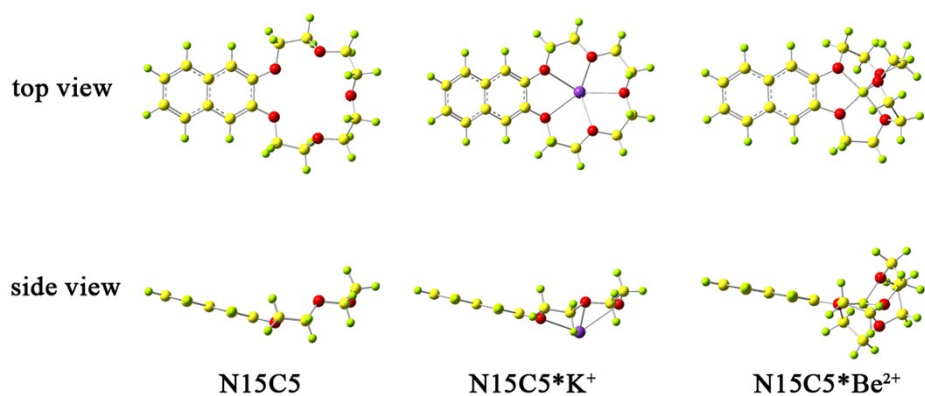

**Fig. S1** Optimized structures of N15C5, N15C5\*K<sup>+</sup>, N15C5\*Be<sup>2+</sup>.

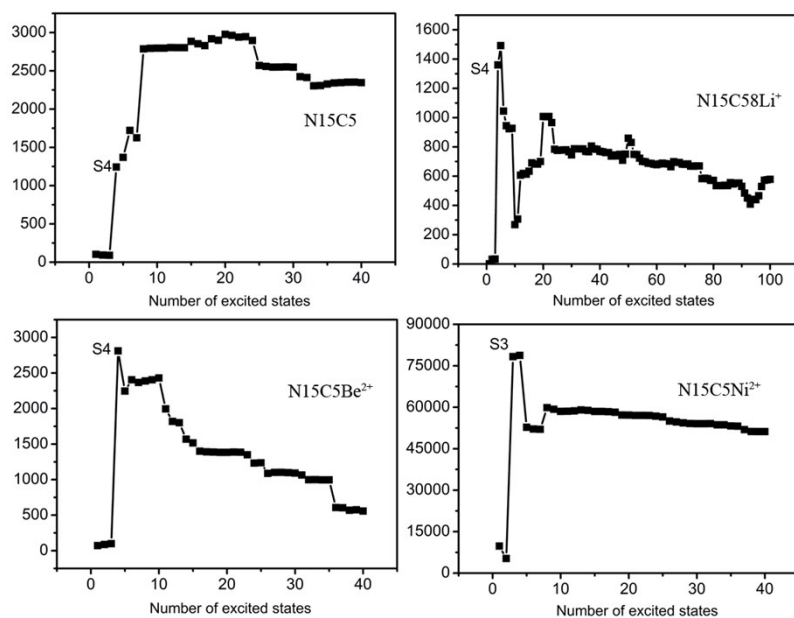

**Fig. S2** Convergent behavior of  $\beta_{\text{tot}}$  values of N15C5, N15C5\*Li<sup>+</sup>, N15C5\*Be<sup>2+</sup> and N15C5\*Ni<sup>2+</sup> dependent on the first 40 states.
